# Supplementary material
Source: MDPI journal article supplement (https://www.mdpi.com/1999-4923/14/1/213)
Supplement: s1 [file s1]

Archive with 1 entries (1 files):
- pharmaceutics-1524798 supplementary revised.pdf
